# Supplementary material
Source: HighWire-hosted journal article supplement (http://rc.rcjournal.com/highwire/filestream/16382/field_highwire_adjunct_files/0/suppl_1.pdf)
Supplement: suppl_1.pdf [file suppl_1.pdf]

Vios™ Aerosol Delivery System Configurations

|                      | Part #     | NDC #         | HCPCS #      |
|----------------------|------------|---------------|--------------|
| Standard, LC® Sprint | 310F35-LCS | 83490-0310-58 | E0570, A7005 |
| Standard, LC® Plus   | 310F83-LC+ | 83490-0310-67 | E0570, A7005 |
| Deluxe, LC® Sprint   | 310F35-LSD | 83490-0310-59 | E0570, A7005 |
| Deluxe, LC® Plus     | 310F81-LCD | 83490-0310-64 | E0570, A7005 |

All configurations include Wing Tip™ Tubing



(OR)









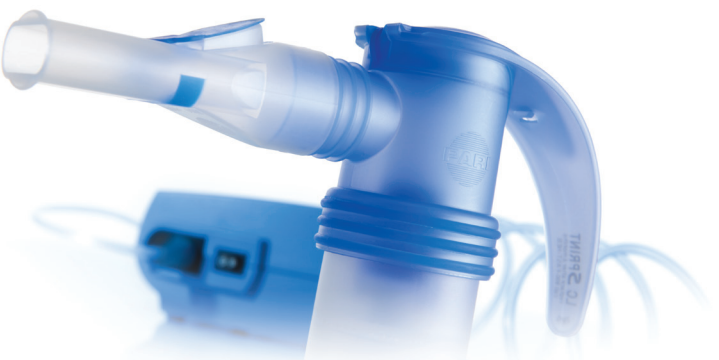

Life Inspired

Technical Specifications:

- Maximum Pressure of Compressor = 34 PSI (2.3 bar)
- Maximum Liter Flow of Compressor = 8.5 LPM
- Nominal Operating Pressure<sup>2</sup> = 18 PSI (1.2 bar)
- Nominal Air Flow<sup>2</sup> = 4.5 LPM
- Weight = 3 lbs (1300 gms)
- Dimensions (Length, Width, Height) = 6.5 x 6.5 x 3.75 in
- Warranty = 5 years, 6 years user activated

Vios™ Accessories :

- PARI LC Sprint = 023F35
- PARI LC Plus = 022F81
- Replacement Air Filters = 041E4851P12

<sup>2</sup>When used with a PARI LC® reusable nebulizer.

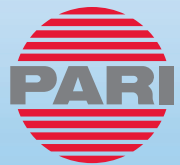

INTRODUCING

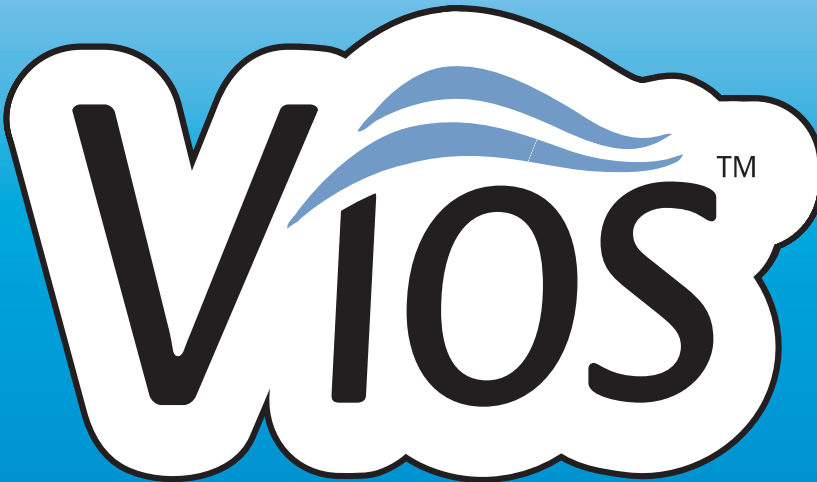

AEROSOL DELIVERY SYSTEM

From the leader in clinically proven aerosol delivery

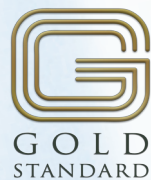

*PARI nebulizers are the most widely used nebulizers by pharmaceutical companies in clinical trials for new medications compared to any other brand.*

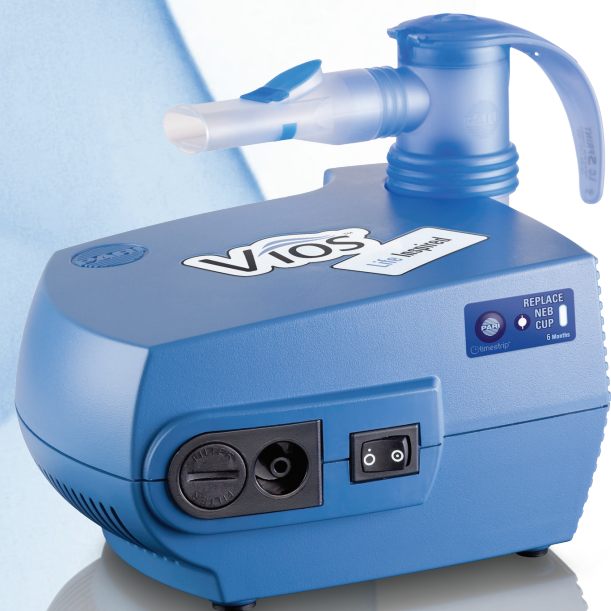

# WHY VIOS™?

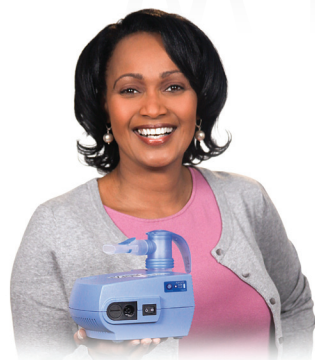

“ Because there is a difference in aerosol delivery systems and Vios™ outperforms the others. ”

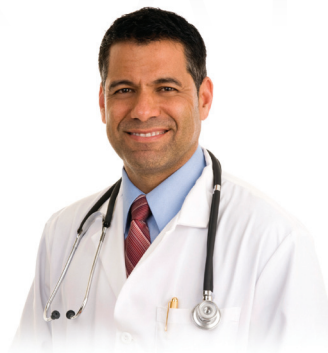

“ Because with Vios™, I am confident that my patients will receive an effective treatment dose. ”

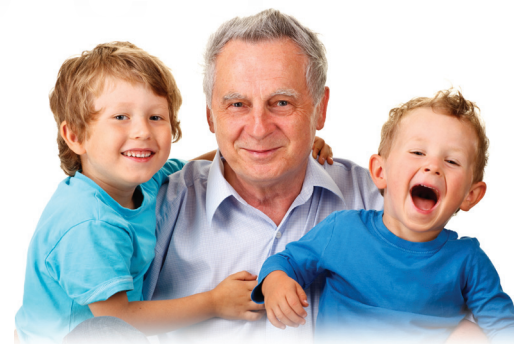

“ Because my Vios™ treatments are fast, I can spend more time with my grandchildren. ”

The Vios™ Aerosol Delivery System is designed from PARI's long legacy of clinically proven products and consists of two important components: a Vios™ compressor and a PARI nebulizer. Vios™ was inspired by the Latin and Greek words for “Life”. Our goal is to improve quality of “Life” and patient lifestyle through efficient aerosol delivery. The Vios™ delivers consistent particle size and fast treatments resulting in targeted delivery to the lungs.

## Consistent Aerosol Delivery

EXCLUSIVE TO PARI, **TIMESTRIP®** IS AN EASY TO USE, VISUAL INDICATOR THAT CLEARLY INSTRUCTS PATIENTS TO REPLACE THEIR PARI REUSABLE NEBULIZERS EVERY 6 MONTHS. NO MORE GUESSWORK OR HASSLE WITH CALENDARS.

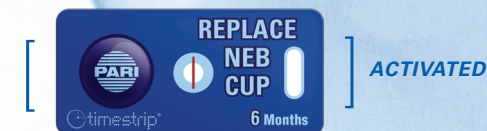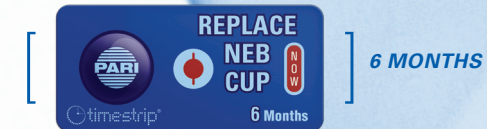

- Easy to use and activate
- Great for Patient Reminder programs
- Benefits of replacing PARI nebulizers:
  1. Consistent medication delivery
  2. Fast treatment times
  3. Reduces the risk for bacterial contamination<sup>1</sup>

<sup>1</sup>Lester, Mary K. Nebulizer Use and Maintenance by Cystic Fibrosis Patients: A Survey Study. Respiratory Care 2004; 49(12): 1504-1508.
